# Supplementary material for: Fabrication of core–shell-like structured polymeric ionic liquid hybrid catalysts for aqueous reactions
Source: Royal Society of Chemistry journal article supplement (doi:10.1039/d2dt02570a), 2022-01-01
Supplement: d2dt02570a1.pdf [file d2dt02570a1.pdf]

1                    **Supporting Information**  
2                    **Fabrication of Core-shell like structured Polymeric ionic liquid**  
3                    **hybrid catalysts for aqueous reactions**

4 Xiaotong Lu <sup>a</sup>, Shengnan Li <sup>a</sup>, Chengyao Zhao<sup>a</sup>, Yujing Liu <sup>a,b</sup>, Zhongqiu Liu <sup>a,b</sup>, Anguo Ying <sup>a,b,\*</sup>

5 <sup>a</sup> *School of Chemistry and Chemical Engineering, Qufu Normal University, P. R. China*

6 <sup>b</sup> *Key Laboratory of Life-Organic Analysis of Shandong Province, School of Chemistry and*  
7 *Chemical Engineering, Qufu Normal University, P. R. China*

8

9 E-mail addresses: yinganguo@163.com (A. Ying).

10

11

## 12 **1. Experimental**

### 13 **1.1 Preparation of the ILs**

14 Synthesis of hydrophilic ionic liquids (MIE ILs). (1) Synthesis of tosylated mono-  
15 methoxytriethylene glycol (tosylated m-TEG). A solution of triethylene glycol  
16 monomethyl ether (10.324 g, 62.88 mmol, 1.2eq) and p-Toluenesulfonyl chloride  
17 (10.01 g, 52.4 mmol, 1eq) in DCM (100 mL) was cooled in an ice bath at N<sub>2</sub>  
18 atmosphere, and then triethylamine was added drop by drop to the solution slowly.  
19 The solution was stirred at room temperature for 12 h and then removed insoluble  
20 matter by filtration. The remaining solution was washed by deionized water (3 x 100  
21 mL) and saturated NaHCO<sub>3</sub> (100 mL) in turn and dried over MgSO<sub>4</sub>, and the pure  
22 product was obtained by column chromatography (PE: EA=1:3), eluted purified  
23 product 11.46 g, Yield 68.6%.

24 (2) Synthesis of 3-(2-(2-(2-methoxyethoxy)ethoxy)ethyl)-1-vinyl-1H-imidazol-3-  
25 ium 4-methylbenzenesulfonate ( MIE-ILs). Tosylated m-TEG (2 mmol, 0.64 g) was  
26 added to the mixture of vinylimidazole (2 mmol, 0.18 g) and K<sub>2</sub>CO<sub>3</sub> (2 mmol, 0.276 g)  
27 in dry CH<sub>3</sub>CN (10 mL) and stirred at 60 °C for 24 h at N<sub>2</sub> atmosphere. The reaction  
28 was cooled to room temperature. The solid material was separated by filtration and  
29 washed by H<sub>2</sub>O and EtOAc and obtained the MIE-ILs by reduced pressure distillation.  
30 The structure and chemical composition of MIE-ILs were identified by <sup>1</sup>H NMR  
31 spectrum (see Figure S1). <sup>1</sup>H NMR (500 MHz, DMSO): δ (ppm): 7.68-7.66 (d, 1H),  
32 7.58-7.55 (d, 2H), 7.49-7.51 (d, 1H), 5.67-5.72 (m, 1H), 5.34-5.31 (m, 1H), 4.28-4.34  
33 (m, 2H), 3.77-3.83 (m, 2H), 3.44-3.62 (m, 10H), 3.25 (s, 3H).

34

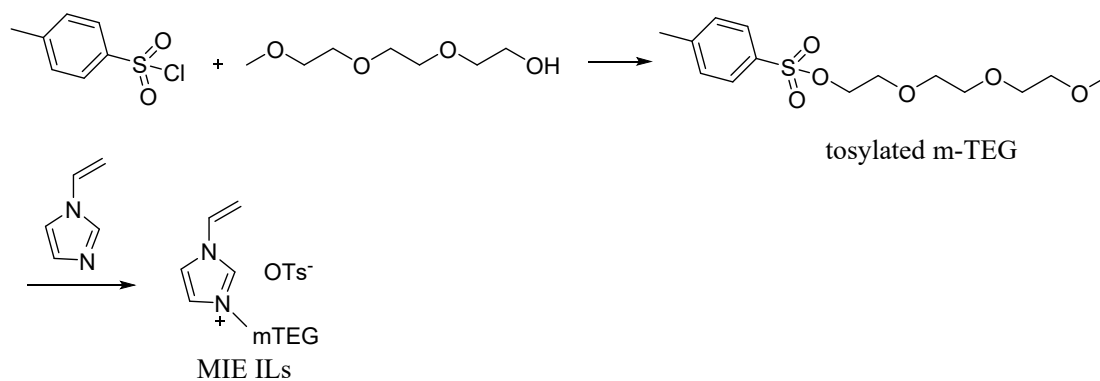

35

36

Scheme S1. Synthesis of the SPA monomer

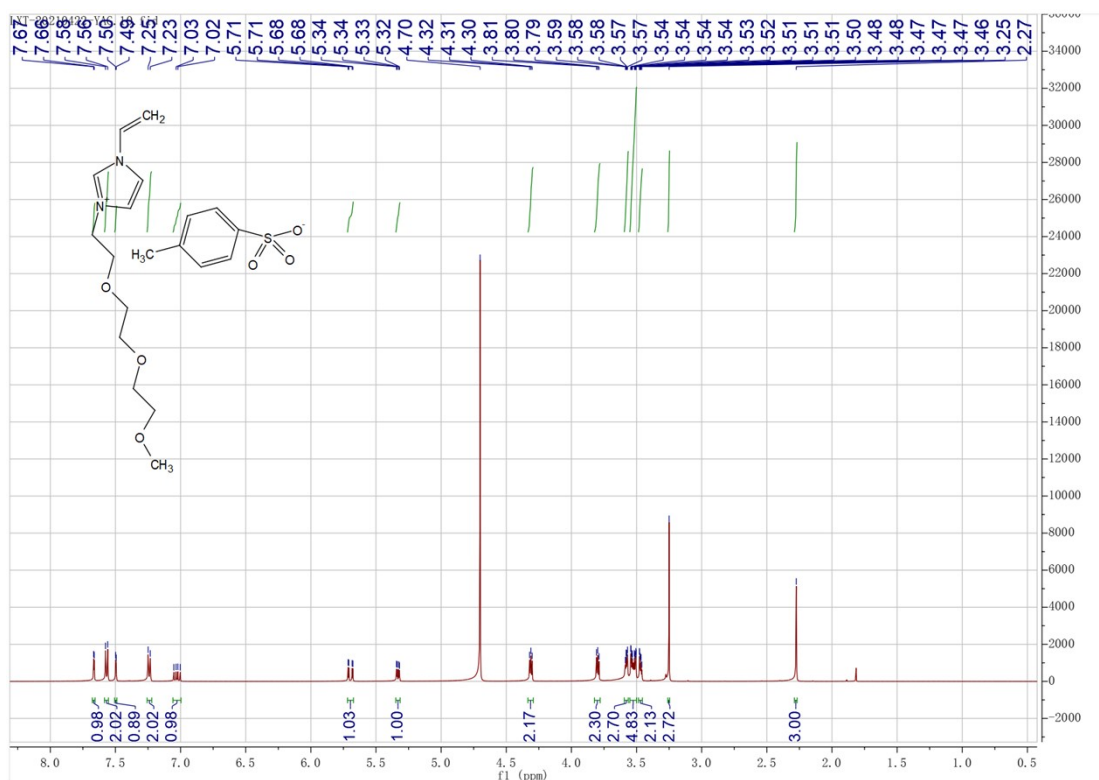

37

38

Fig. S1  $^1\text{H}$  NMR of the MIE-ILs monomer

39

## 40 1.2 Equilibrium adsorption isotherms of MIE@Pd/SiNP-CPDB and

### 41 MIE@Pd/SiNP-CPDB(no PTES) nanoparticles

42 50  $\mu\text{L}$  of styrene were added to 5 mL of water containing 20 mg of different

43 nanoparticles at 303 K, 308 K, 313 K, and 318 K respectively. The adsorption was

44 carried out in a sealed glass vial by equilibrating the mixture for 1 h on a magnetic  
45 stirring apparatus. After adsorption, the materials were directly removed from solution  
46 by filtration. The styrene was extracted by ethyl acetate for 3 times. Then, the amount  
47 of styrene was measured with an internal standard method by gas chromatography.  
48 The adsorption enthalpy was calculated following the derivative Clausius-Clapeyron  
49 equation,  $\ln C_e = \Delta H/(RT) + \ln K$ , where  $\Delta H$  is the adsorption enthalpy (KJ/mol), T is  
50 the absolute temperature (K),  $C_e$  represent the initial and equilibrium concentrations  
51 (mg/g), R is the ideal gas constant [8.314 J/(mol·K)], and K is a constant.

### 52 **1.3 Characterizations of the nMIE@Pd@SiNP-CPDB catalysts**

53 XRD patterns of the nMIE@Pd/SiNP-CPDB catalysts were determined with a  
54 PANalytical Empyrean X-ray diffractometer (Netherlands). The scanning speed was  
55  $10^\circ \text{ min}^{-1}$  from  $2\theta = 10^\circ$  to  $90^\circ$ . The ICP-OES and fourier transform infrared (FTIR)  
56 spectra of the samples were recorded on a Thermo Fisher Scientific (US). XPS  
57 analysis of the surface microstructure information of the samples were performed  
58 with a Thermo Kalpha X-ray photo-electron spectrometer (US). The organic elements  
59 analysis of the catalysts samples were tested by means of a Elementar Vario EL  
60 (Germany). The scanning electron microscope (SEM) of the samples were performed  
61 with a Sigma 500VP (Carl Zeiss AG) and transmission electron microscope (TEM) of  
62 the samples were observed with a JEM-2100PLUS (80-200kV, Japan). N<sub>2</sub>  
63 adsorption-desorption isotherms of the samples were recorded with a KuboX1000  
64 series surface area and porosity analyzer (CN). The thermo gravimetric analysis (TGA)  
65 of the samples were performed with a TA system (NETZSCH, Germany). The

66 conversion of various substrates was determined by GC-MS, nitrogen was used as the  
 67 carrier gas with a flow of  $30 \text{ mL} \cdot \text{min}^{-1}$ , injector temperature and detector temperature  
 68 were  $250 \text{ }^\circ\text{C}$ , column temperature was programmed from  $50$  to  $280 \text{ }^\circ\text{C}$  with  $5$   
 69  $^\circ\text{C} \cdot \text{min}^{-1}$ .

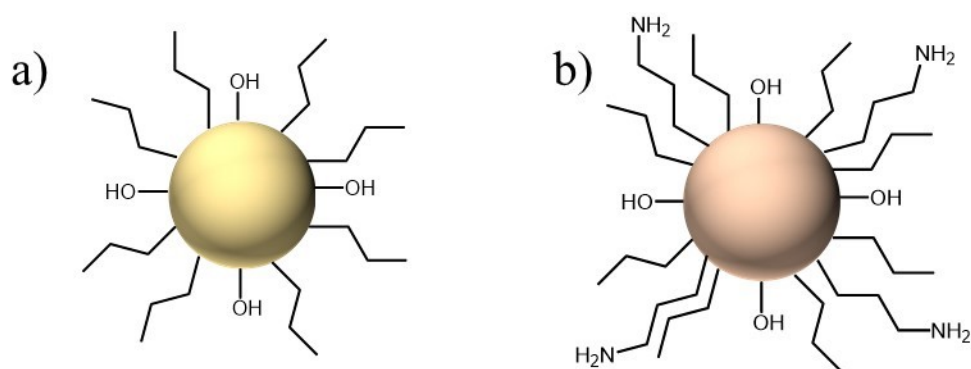

70  
 71 **Fig. S2** Chemical structure schematic of a) Hydrophobic silicon core and b)  
 72 Ammoniated hydrophobic silicon cores.

73

74 **Table S1**

75 Textural parameters of the prepared organic-inorganic hydrophobic silica cores

| Entry | OSi/Si (Mol) | BET surface<br>area ( $\text{m}^2 \text{ g}^{-1}$ ) | Pore volume<br>( $\text{cm}^3 \text{ g}^{-1}$ ) | Average pore<br>size (nm) |
|-------|--------------|-----------------------------------------------------|-------------------------------------------------|---------------------------|
| 1     | 1- 0         | 552                                                 | 2.11                                            | 4.68                      |
| 2     | 1- 0.1       | 896                                                 | 0.88                                            | 2.80                      |
| 3     | 1- 0.2       | 804                                                 | 0.79                                            | 2.85                      |
| 4     | 1- 0.3       | 859                                                 | 0.70                                            | 2.87                      |
| 5     | 1- 0.4       | 836                                                 | 0.67                                            | 2.85                      |
| 6     | 1- 0.5       | 850                                                 | 0.63                                            | 2.86                      |

76

77

78 **Table S2**

79 Textural parameters of Pd/SiNP-CPDB, MIE@Pd/SiNP-CPDB, 2MIE@Pd/SiNP-  
80 CPDB and 3MIE@Pd/SiNP-CPDB.

| Entry | Sample            | BET surface<br>area (m <sup>2</sup> g <sup>-1</sup> ) | Pore volume<br>(cm <sup>3</sup> g <sup>-1</sup> ) | Average pore<br>size (nm) |
|-------|-------------------|-------------------------------------------------------|---------------------------------------------------|---------------------------|
| 1     | Pd/SiNP-CPDB      | 713                                                   | 0.65                                              | 2.81                      |
| 2     | MIE@Pd/SiNP-CPDB  | 574                                                   | 0.55                                              | 2.74                      |
| 3     | 2MIE@Pd/SiNP-CPDB | 489                                                   | 0.41                                              | 2.50                      |
| 4     | 3MIE@Pd/SiNP-CPDB | 409                                                   | 0.31                                              | 2.41                      |

81

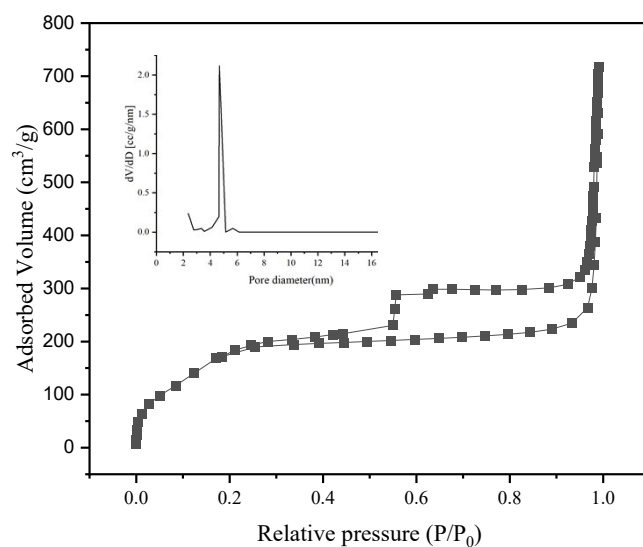

82

83 **Figure S3.** N<sub>2</sub> adsorption-desorption isotherm and pore size distribution of SiNP-  
84 CPDB with OSi/Si molar ratio of 0/1.

85

86

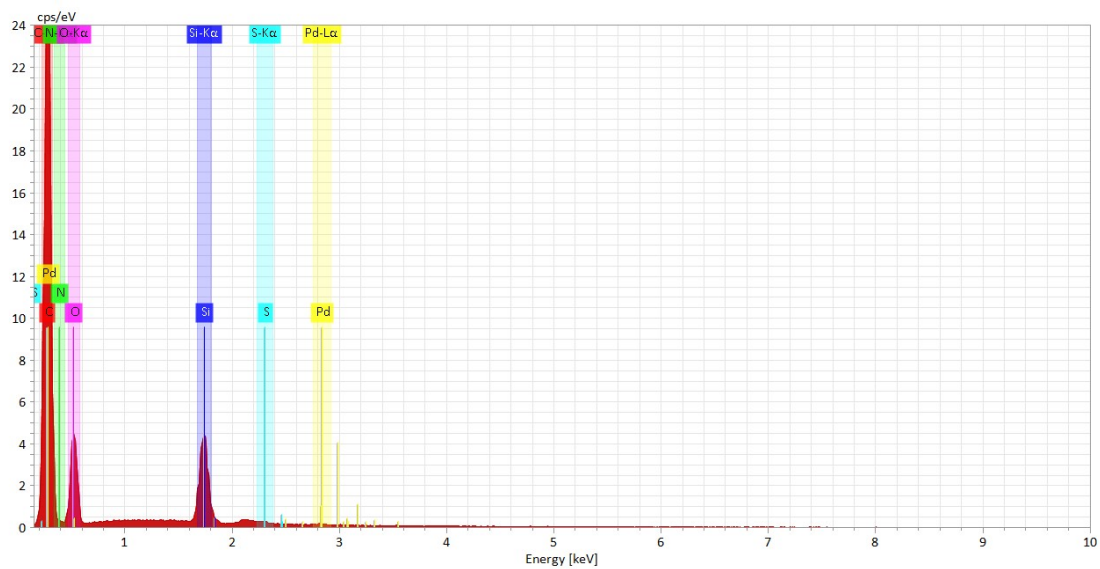

87

88 **Figure S4.** EDX spectrum of the MIE@Pd/SiNP-CPDB catalyst.

89

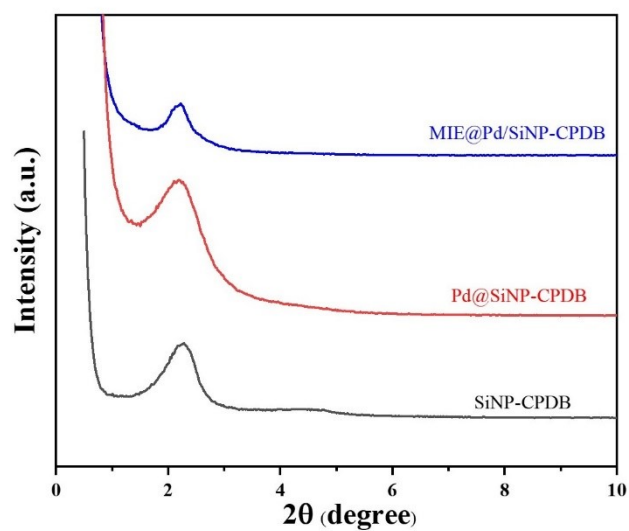

90

91 **Figure S5.** Low angle XRD of SiNP-CPDB, Pd/SiNP-CPDB and MIE@Pd/SiNP-  
92 CPDB.

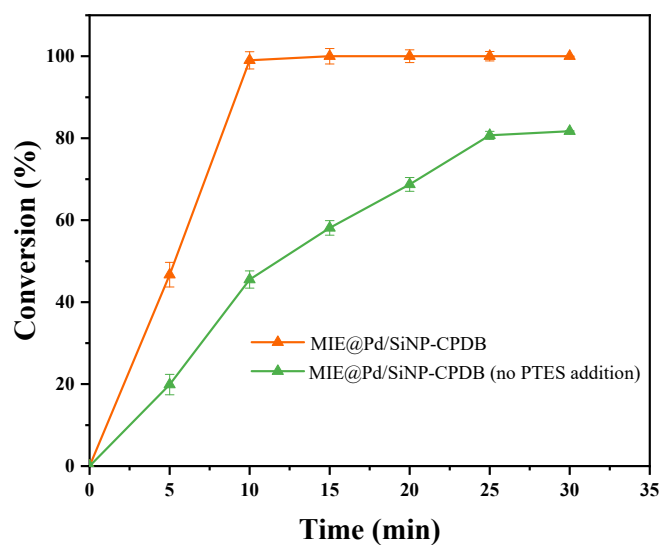

93

94 **Figure S6.** Hydrogenation of styrene catalyzed by MIE@Pd/SiNP-CPDB and  
 95 MIE@Pd/SiNP-CPDB (no PTES addition).

96

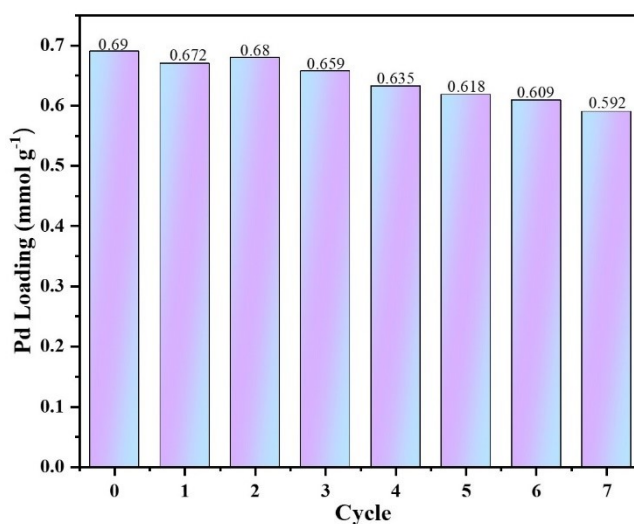

97

98 **Figure S7.** The Pd loading of MIE@Pd/SiNP-CPDB after every cycle detected by  
 99 ICP-OES.

100

101 **Table S3.** The catalytic effect of different catalysts on styrene hydrogenation.

| Reaction | Reaction | Yield |
|----------|----------|-------|
|----------|----------|-------|



| Entry | catalyst              | Time<br>(min) | condition         | (Con.)<br>(%) | Ref.         |
|-------|-----------------------|---------------|-------------------|---------------|--------------|
| 1     | MIE@Pd/SiNP-CPDB      | 10            | 25 °C<br>101 kPa  | 100           | This<br>work |
| 2     | [C4AzoC2DMEA]Br/Pd@SM | 40            | 25 °C<br>101 kPa  | >99           | 1            |
| 3     | Pd/MSS-C20            | 35            | 40 °C<br>0.35 MPa | 89            | 2            |
| 4     | Pd/SN-ON              | 90            | 40 °C<br>0.35 MPa | >99           | 3            |
| 5     | Pd/PEG4000            | 90            | 25 °C<br>101 kPa  | 60            | 4            |

102

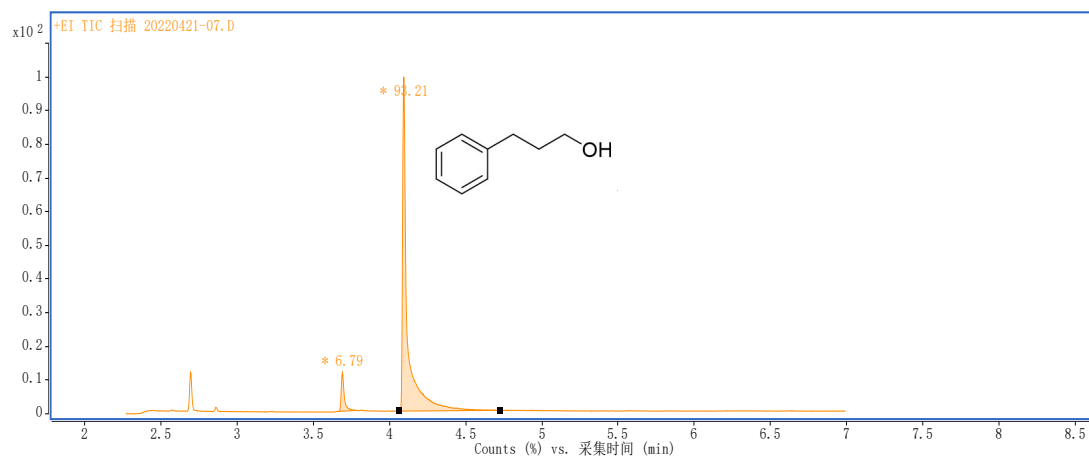

103

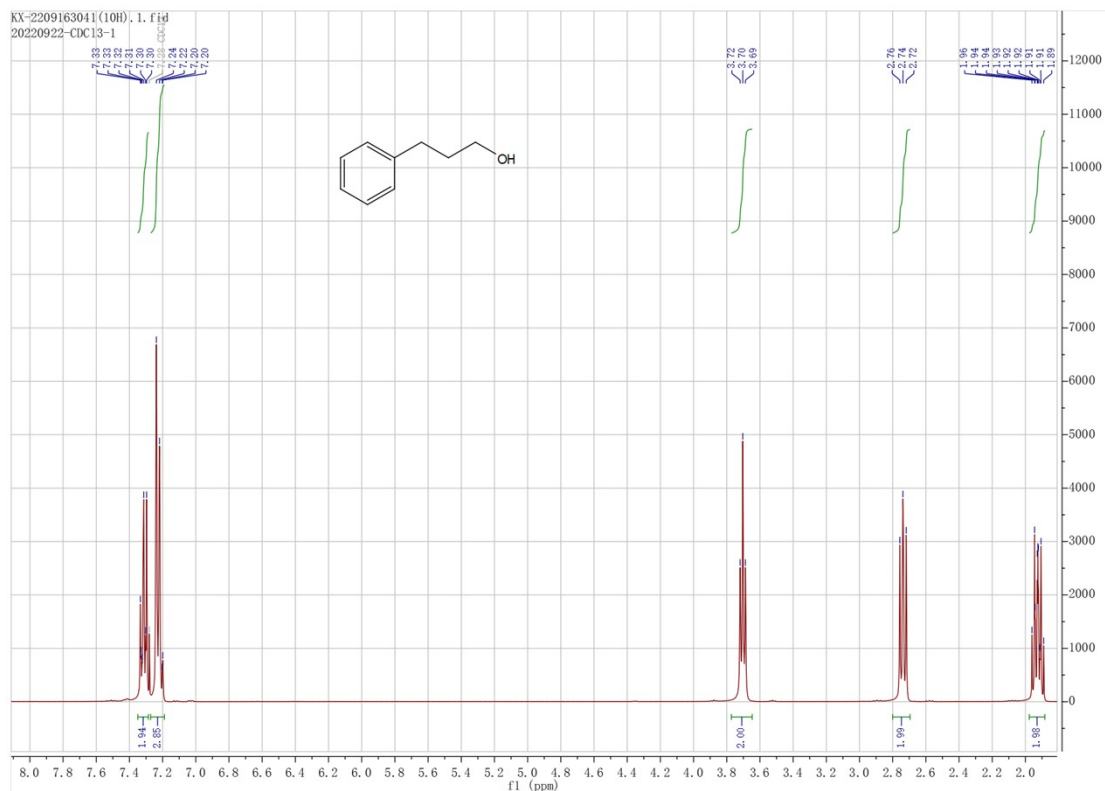

104

105  $^1\text{H}$  NMR (500 MHz,  $\text{CDCl}_3$ ):  $\delta$  (ppm): 7.33-7.30 (m, 2H), 7.24-7.20 (m, 3H), 3.72-  
 106 3.69 (t, 2H), 2.76-2.72 (t, 2H), 1.96-1.89 (m, 2H).

107 **Figure S8.** The GC-MS and  $^1\text{H}$  NMR spectrum of the hydrogenation results (table 2  
 108 of main text, entry 1).

109

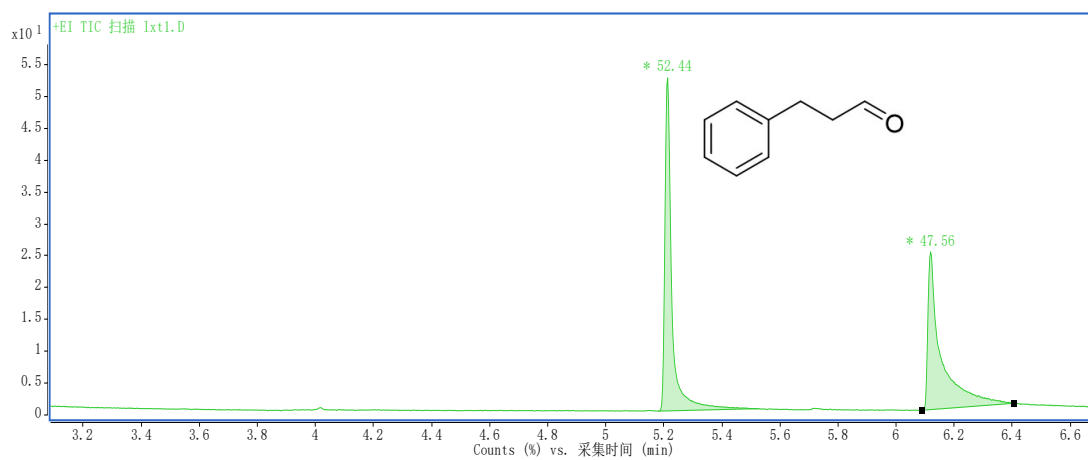

110

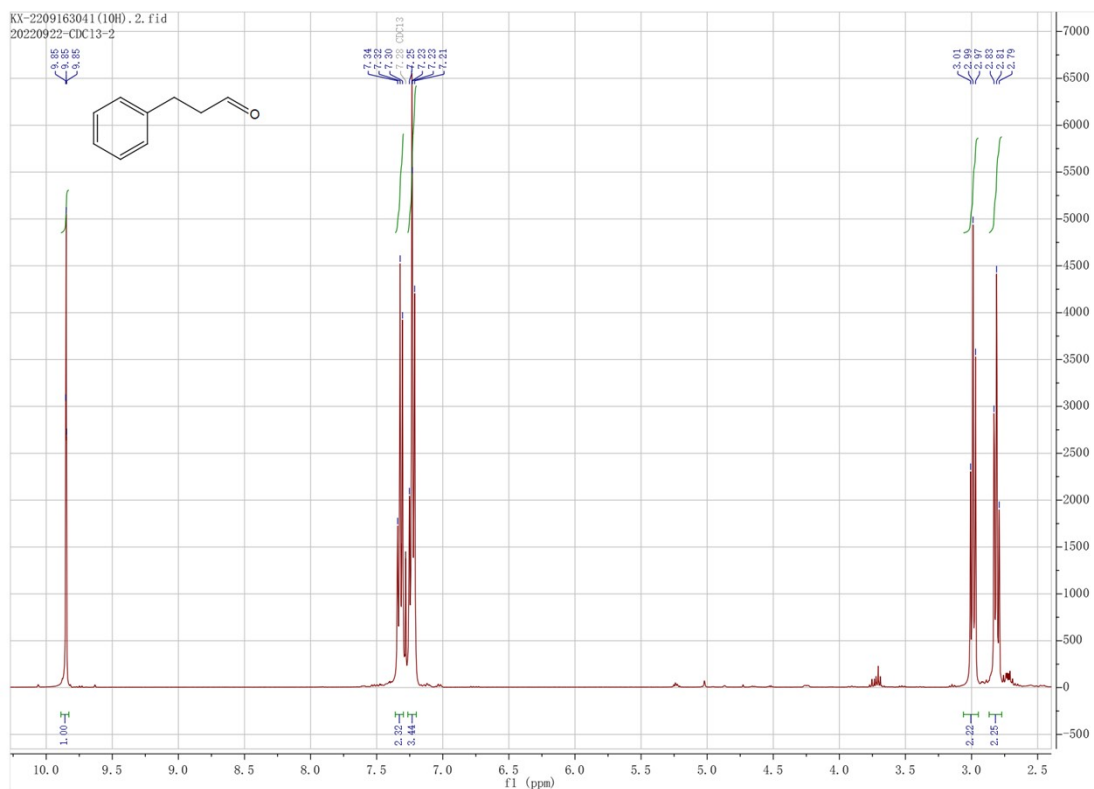

111

112  $^1\text{H}$  NMR (500 MHz,  $\text{CDCl}_3$ ):  $\delta$  (ppm): 9.85 (s,1H) 7.34-7.30 (m, 2H), 7.25-7.21 (m,  
113 3H), 3.01-2.97 (t, 2H), 2.83-2.79 (t, 2H).

114 **Figure S9.** The GC-MS and  $^1\text{H}$  NMR spectrum of the hydrogenation results (table 2  
115 of main text, entry 2).

116

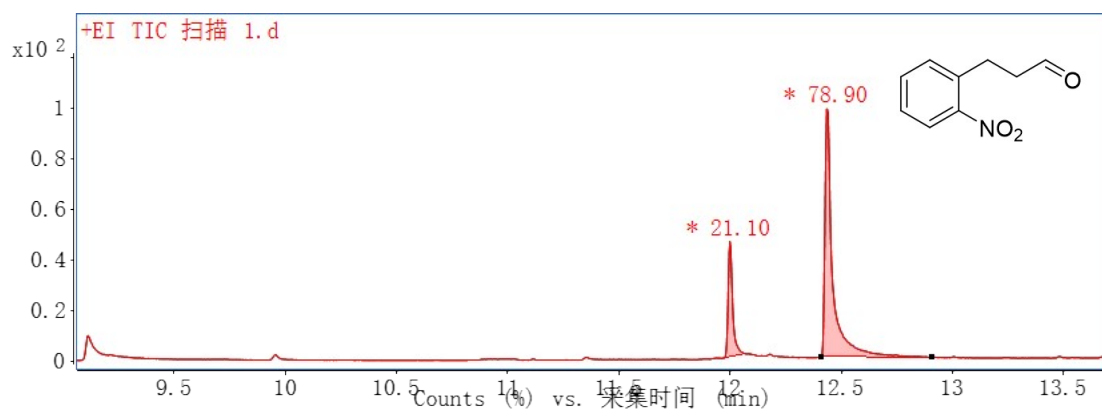

117

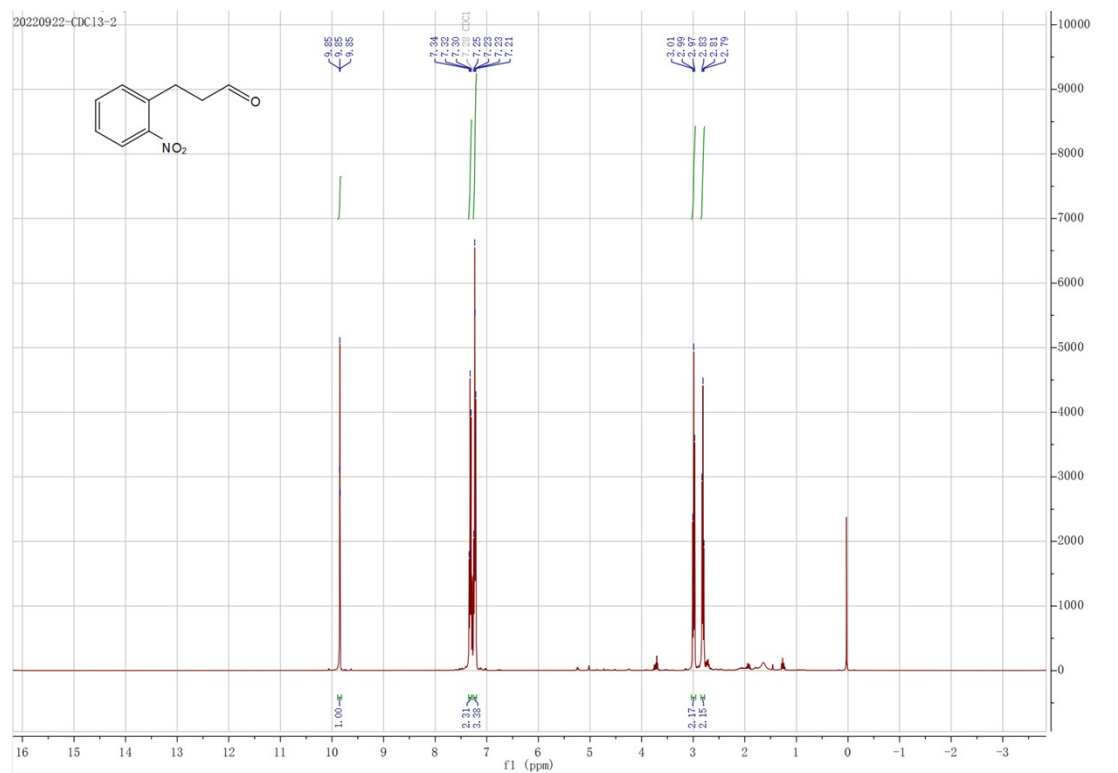

118

119  $^1\text{H}$  NMR (500 MHz,  $\text{CDCl}_3$ ):  $\delta$  (ppm): 9.85 (s, 1H) 7.34-7.30 (m, 2H), 7.25-7.21 (m,  
120 3H), 3.01-2.97 (t, 2H), 2.83-2.79 (t, 2H).

121 **Figure S10.** The GC-MS and  $^1\text{H}$  NMR spectrum of the hydrogenation results (table 2  
122 of main text, entry 3).

123

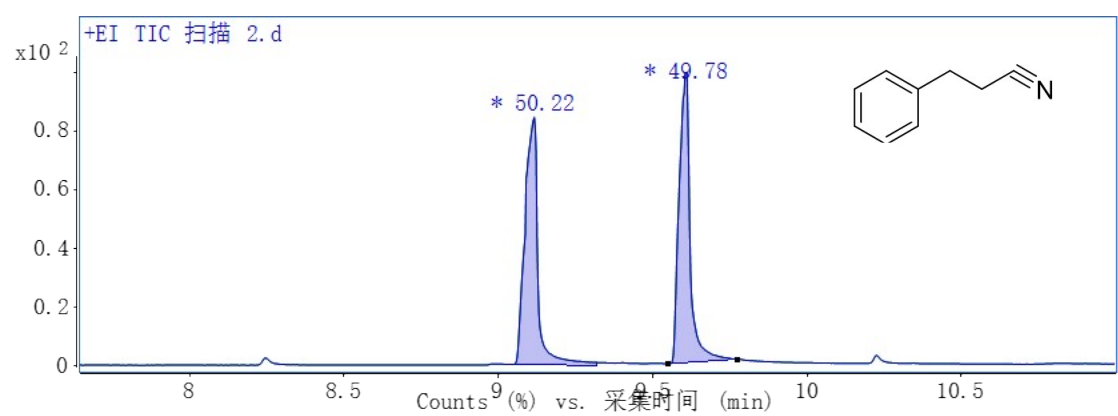

124

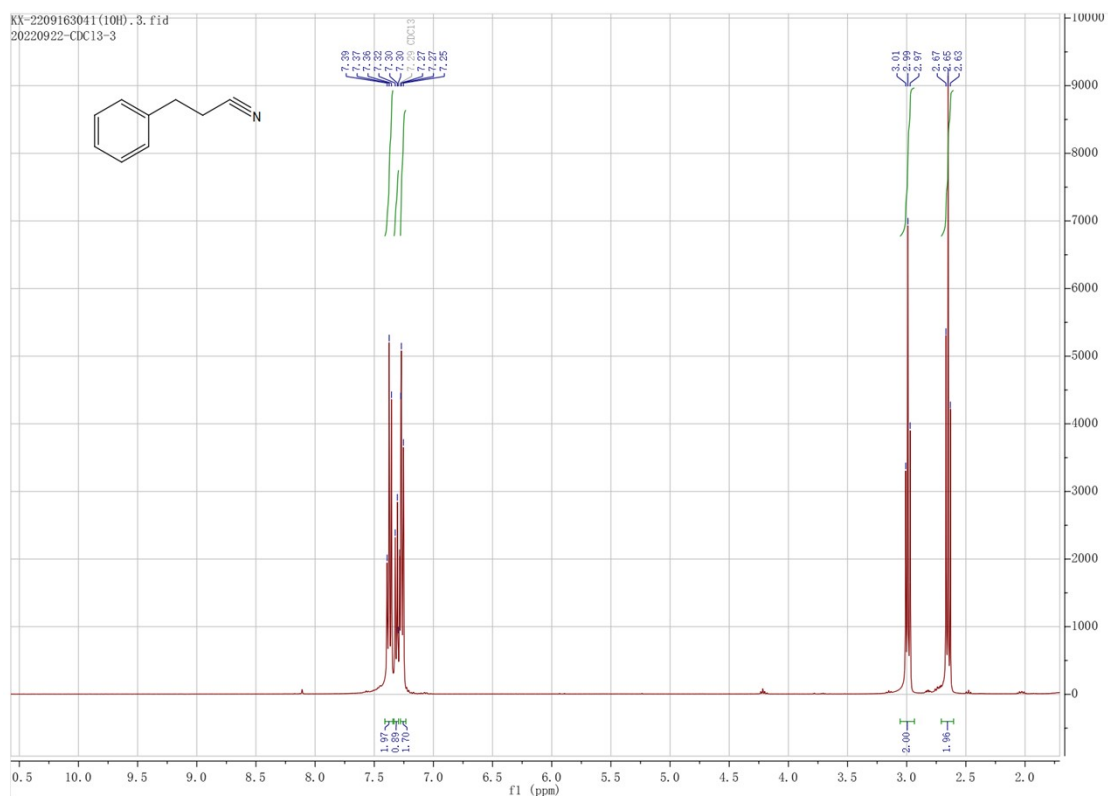

125

126  $^1\text{H}$  NMR (500 MHz,  $\text{CDCl}_3$ ):  $\delta$  (ppm): 7.39-7.32 (M, 2H) , 7.30 (S, 1H), 7.27-7.25

127 (t, 2H), 3.01-2.97 (t, 2H), 2.67-2.63 (t, 2H).

128 **Figure S11.** The GC-MS and  $^1\text{H}$  NMR spectrum of the hydrogenation results (table 2

129 of main text, entry 4).

130

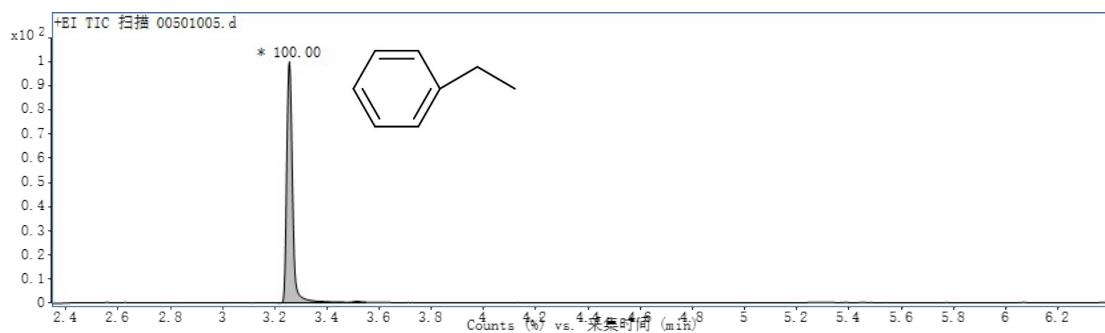

131

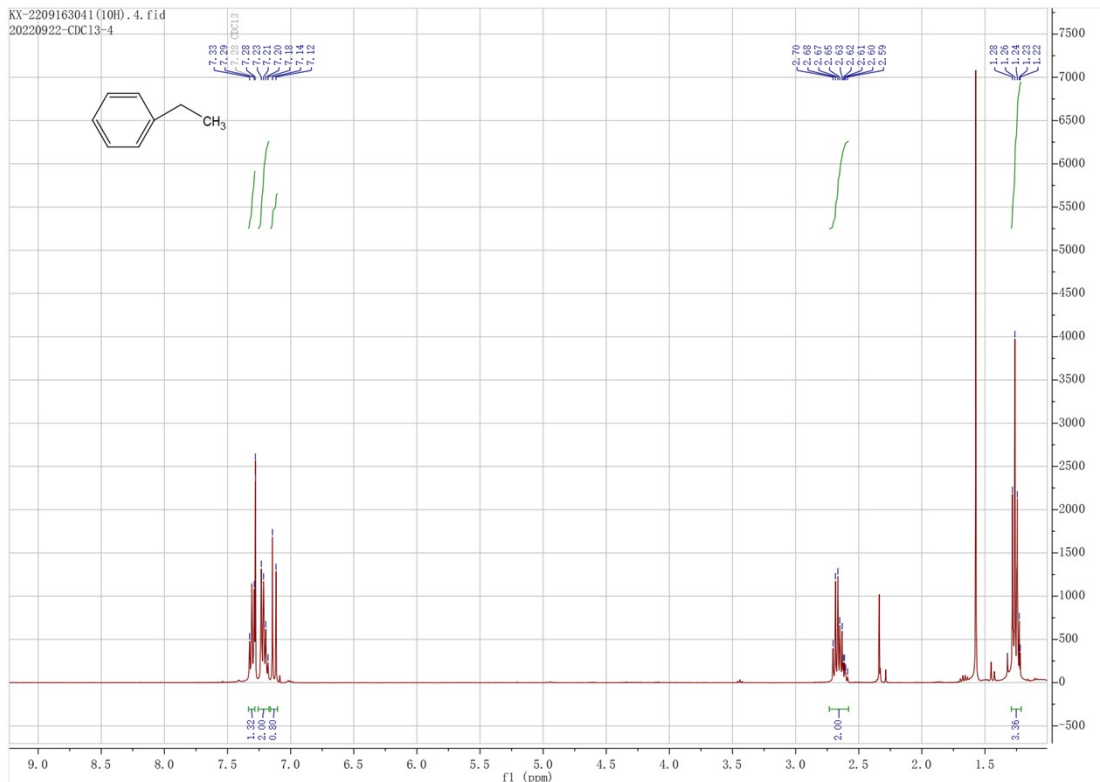

132

133  $^1\text{H}$  NMR (500 MHz,  $\text{CDCl}_3$ ):  $\delta$  (ppm): 7.33-7.29 (d, 2H), 7.28-7.12 (m, 3H), 2.70-  
134 2.59 (m, 2H), 1.28-1.22 (m, 3H).

135 **Figure S12.** The GC-MS and  $^1\text{H}$  NMR spectrum of the hydrogenation results (table 2  
136 of main text, entry 5).

137

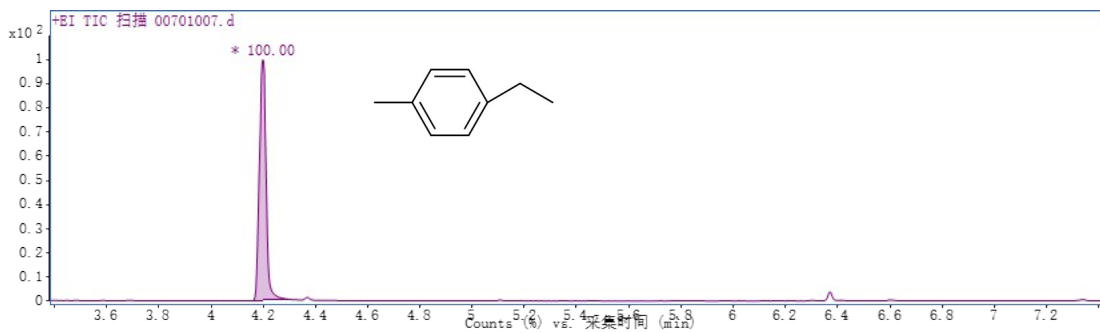

138

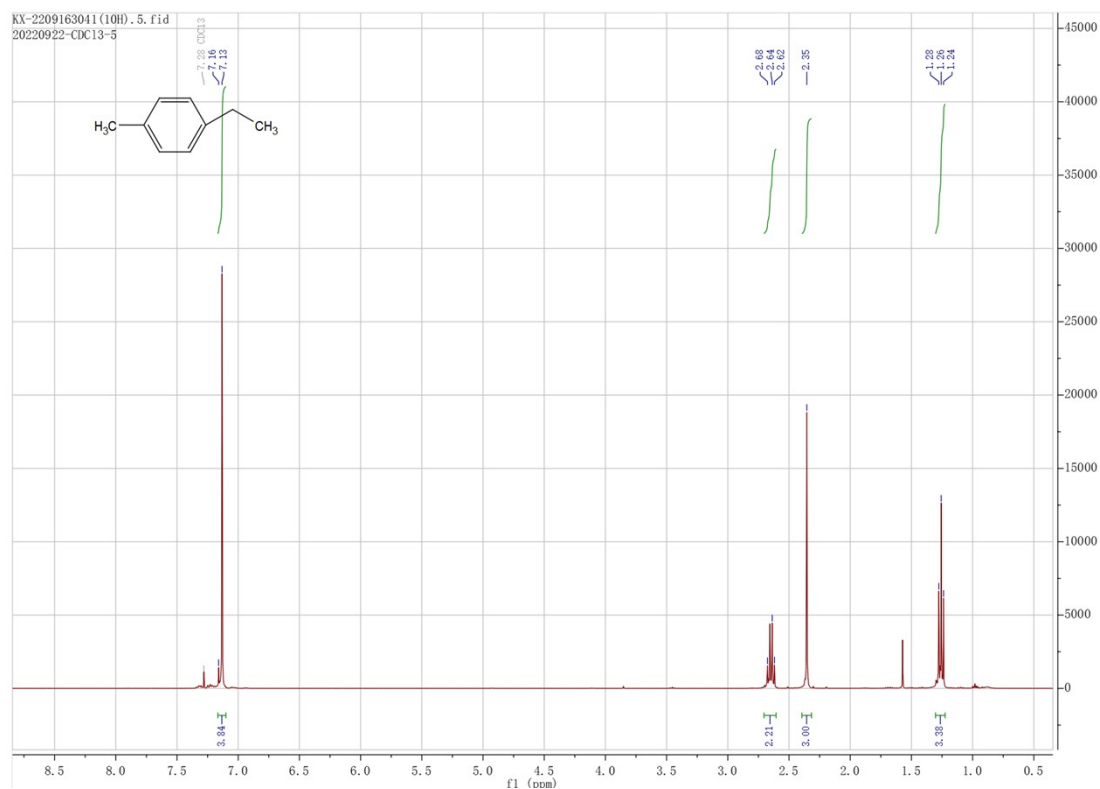

140  $^1\text{H}$  NMR (500 MHz,  $\text{CDCl}_3$ ):  $\delta$  (ppm): 7.16-7.13 (d, 4H), 2.68-2.62 (m, 2H), 2.35 (s,

141 3H), 1.28-1.24 (m, 3H).

142 **Figure S13.** The GC-MS and  $^1\text{H}$  NMR spectrum of the hydrogenation results (table 2

143 of main text, entry 6).

144

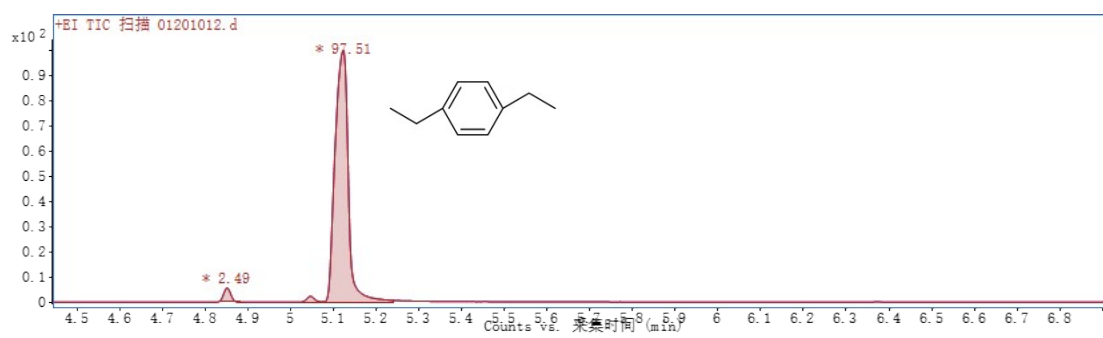

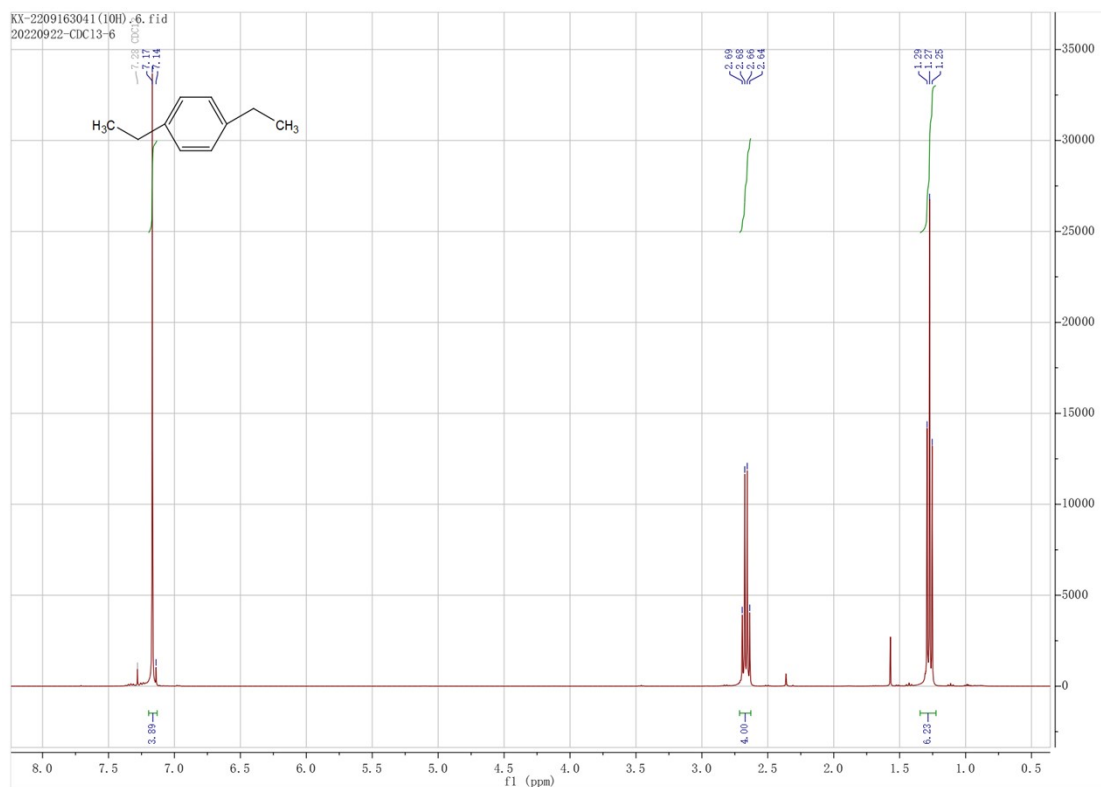

147  $^1\text{H}$  NMR (500 MHz,  $\text{CDCl}_3$ ):  $\delta$  (ppm): 7.17-7.14 (d, 4H), 2.69-2.64 (m, 4H), 1.29-  
148 1.25 (m, 6H).

149 **Figure S14.** The GC-MS and  $^1\text{H}$  NMR spectrum of the hydrogenation results (table 2  
150 of main text, entry 7).

151

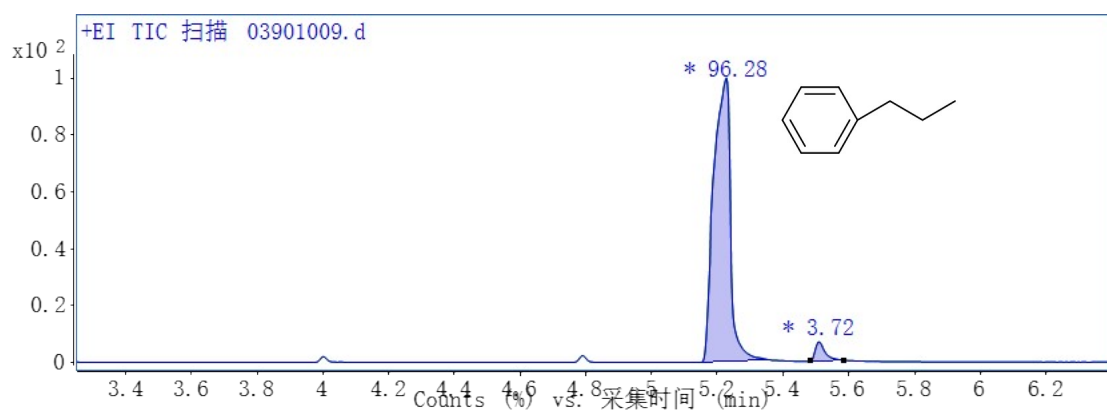



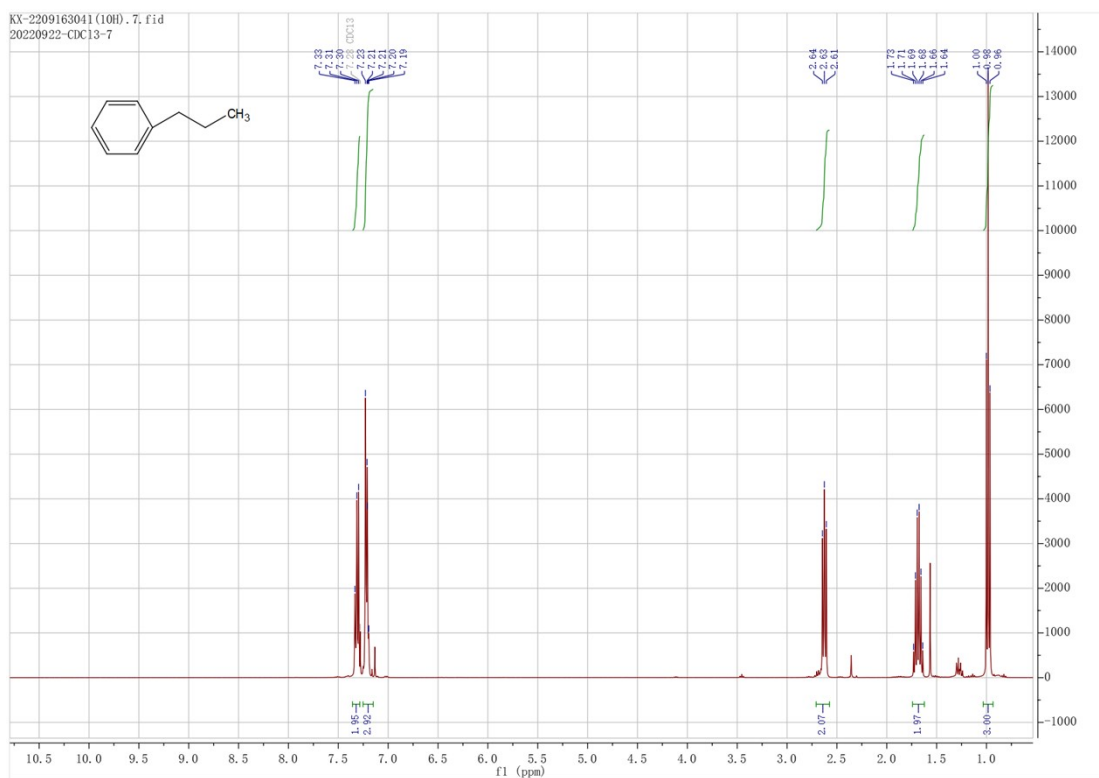

153

154 <sup>1</sup>H NMR (500 MHz, CDCl<sub>3</sub>): δ (ppm): 7.33-7.31 (m, 2H), 7.23-7.19 (m, 3H), 2.64-

155 2.61 (t, 2H), 1.73-1.64 (m, 2H), 1.00-0.96 (t, 3H).

156 **Figure S15.** The GC-MS and <sup>1</sup>H NMR spectrum of the hydrogenation results (table 2

157 of main text, entry 8).

158

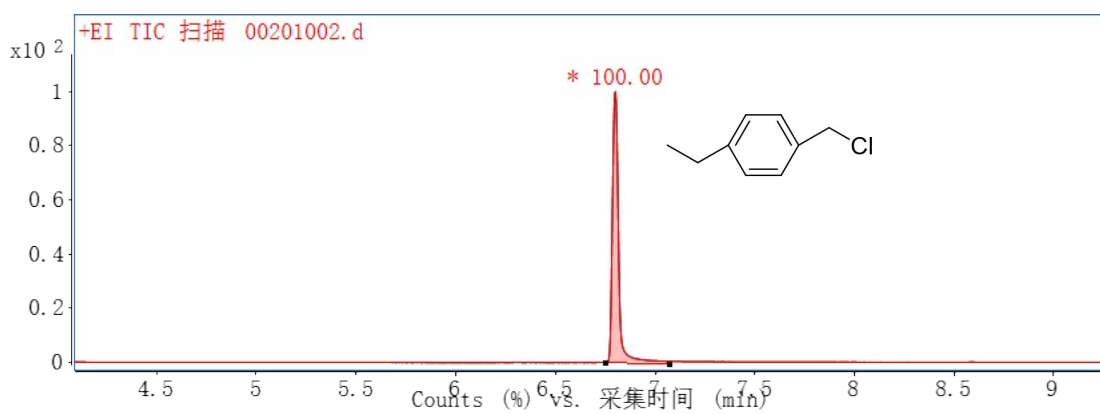

159

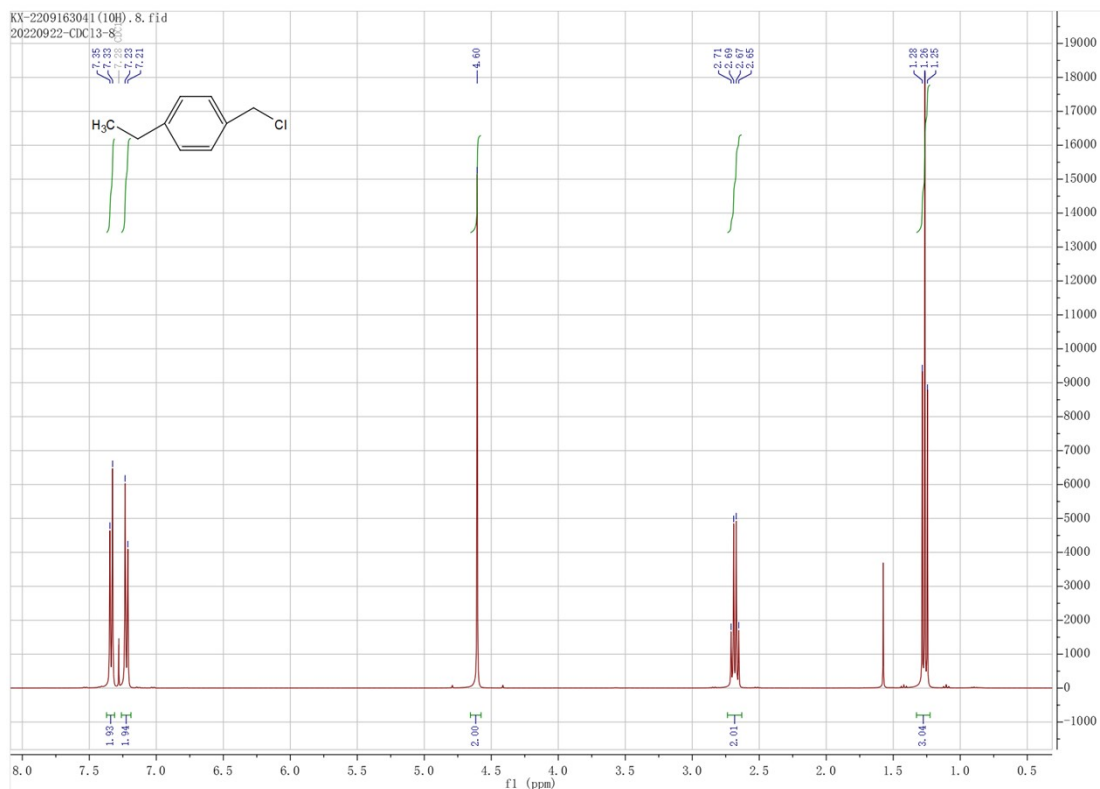

160

161  $^1\text{H}$  NMR (500 MHz,  $\text{CDCl}_3$ ):  $\delta$  (ppm): 7.35-7.33 (d, 2H), 7.23-7.21 (d, 2H), 4.60 (s,

162 2H), 2.71-2.65 (m, 2H), 1.28-1.25 (t, 3H).

163 **Figure S16.** The GC-MS and  $^1\text{H}$  NMR spectrum of the hydrogenation results (table 2

164 of main text, entry 9).

165

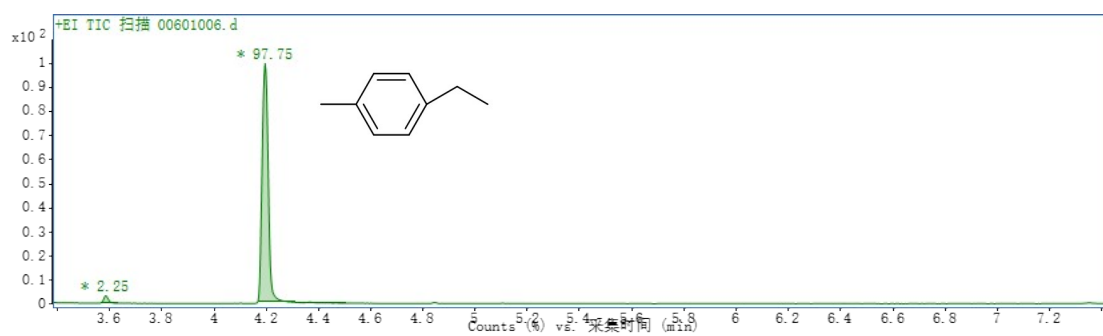

166

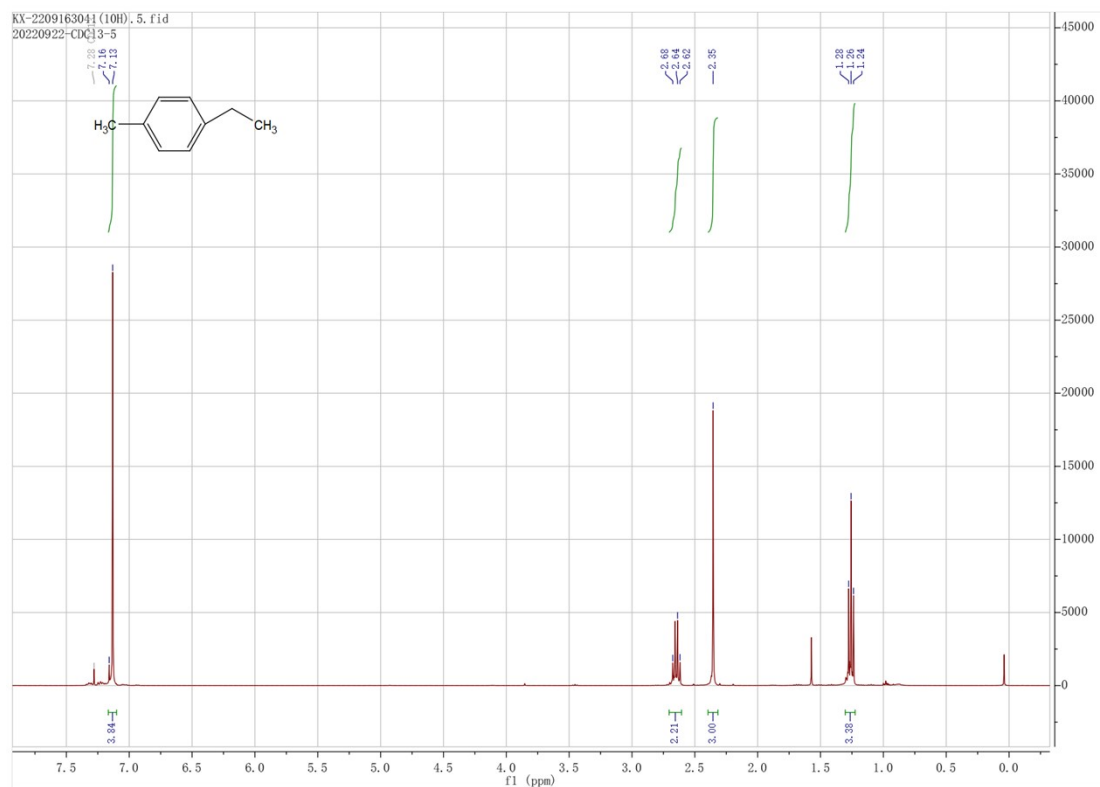

167

168 <sup>1</sup>H NMR (500 MHz, CDCl<sub>3</sub>): δ (ppm): 7.16-7.13 (d, 4H), 2.68-2.62 (m, 2H), 2.35 (s,

169 3H), 1.28-1.24 (t, 3H).

170 **Figure S17.** The GC-MS and <sup>1</sup>H NMR spectrum of the hydrogenation results (table 2

171 of main text, entry 10).

172

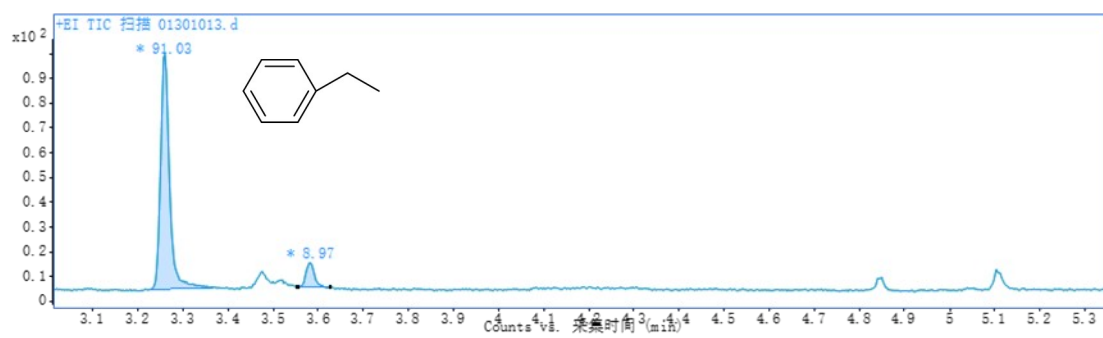

173

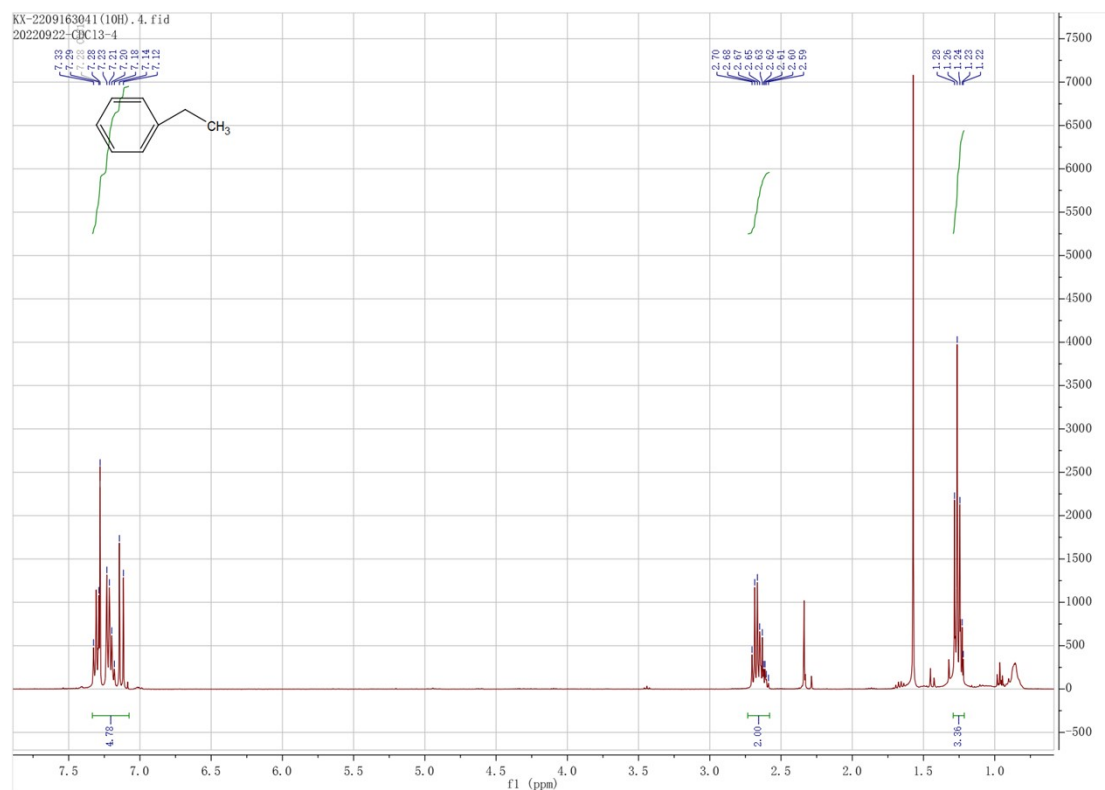

174

175  $^1\text{H}$  NMR (500 MHz,  $\text{CDCl}_3$ ):  $\delta$  (ppm): 7.33-7.12 (m, 5H), 2.70-2.59 (m, 2H), 1.28-

176 1.22 (m, 3H).

177 **Figure S18.** The GC-MS and  $^1\text{H}$  NMR spectrum of the hydrogenation results (table 2

178 of main text, entry 11).

179

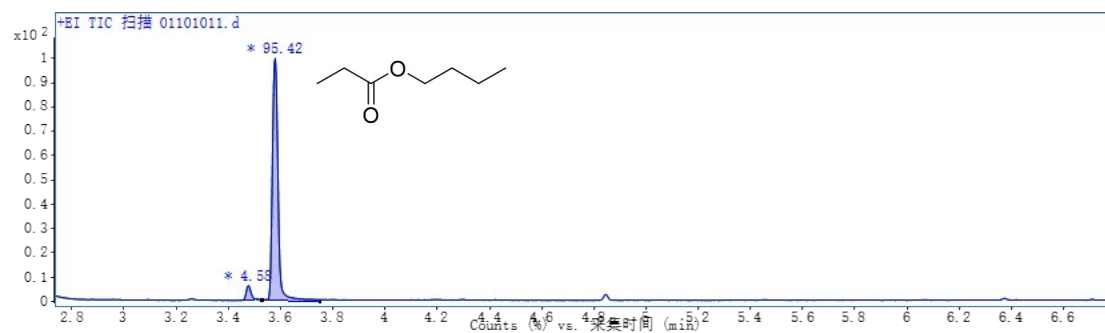

180

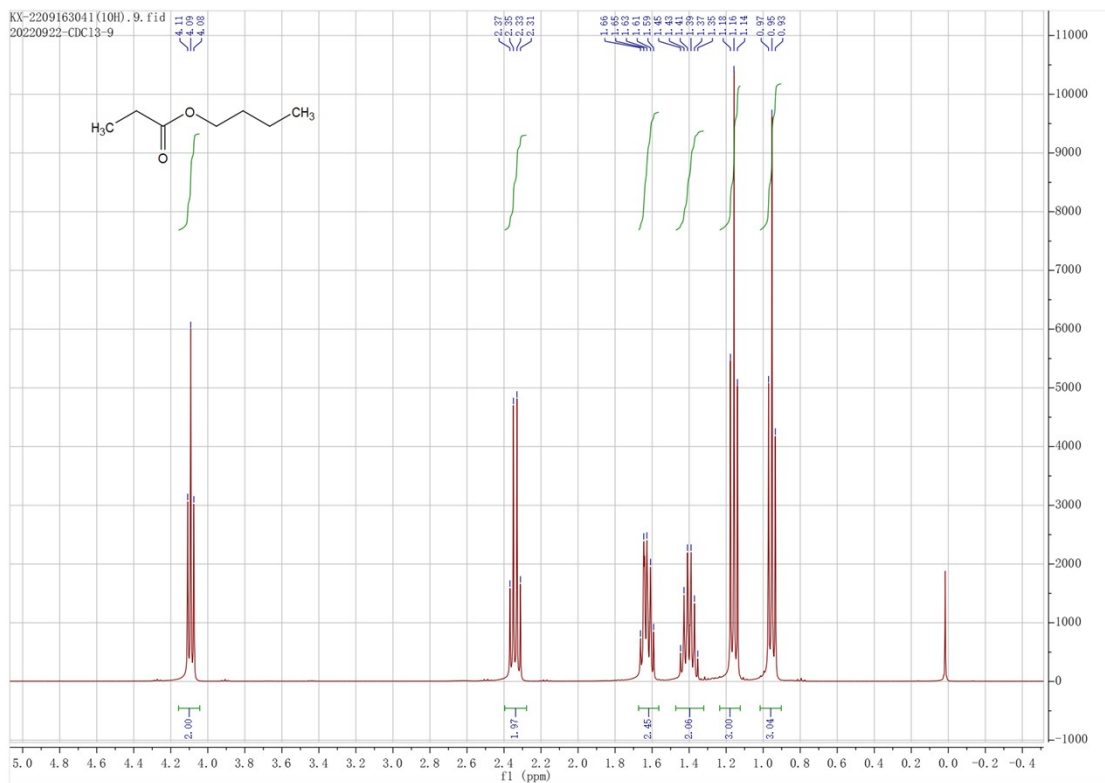

181

182  $^1\text{H}$  NMR (500 MHz,  $\text{CDCl}_3$ ):  $\delta$  (ppm): 4.11-4.08 (t, 2H), 2.37-2.31 (m, 2H), 1.66-1.59

183 (m, 2H), 1.45-1.35 (m, 2H), 1.18-1.14 (t, 3H), 0.97-0.93 (t, 3H).

184 **Figure S19.** The GC-MS and  $^1\text{H}$  NMR spectrum of the hydrogenation results (table 2

185 of main text, entry 12).

186

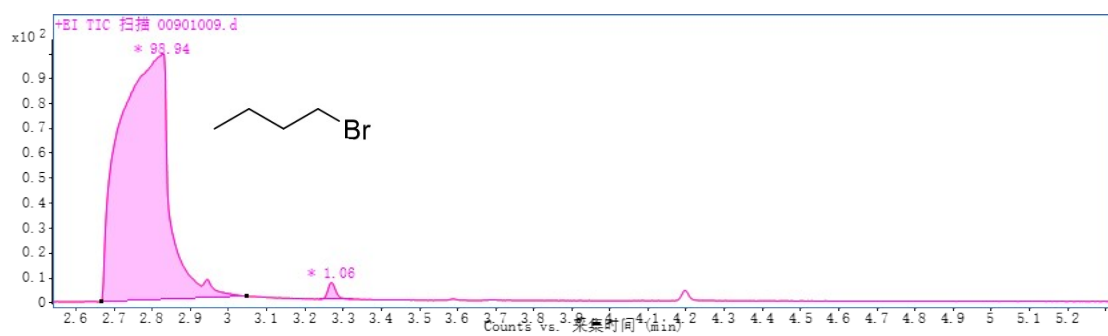

187

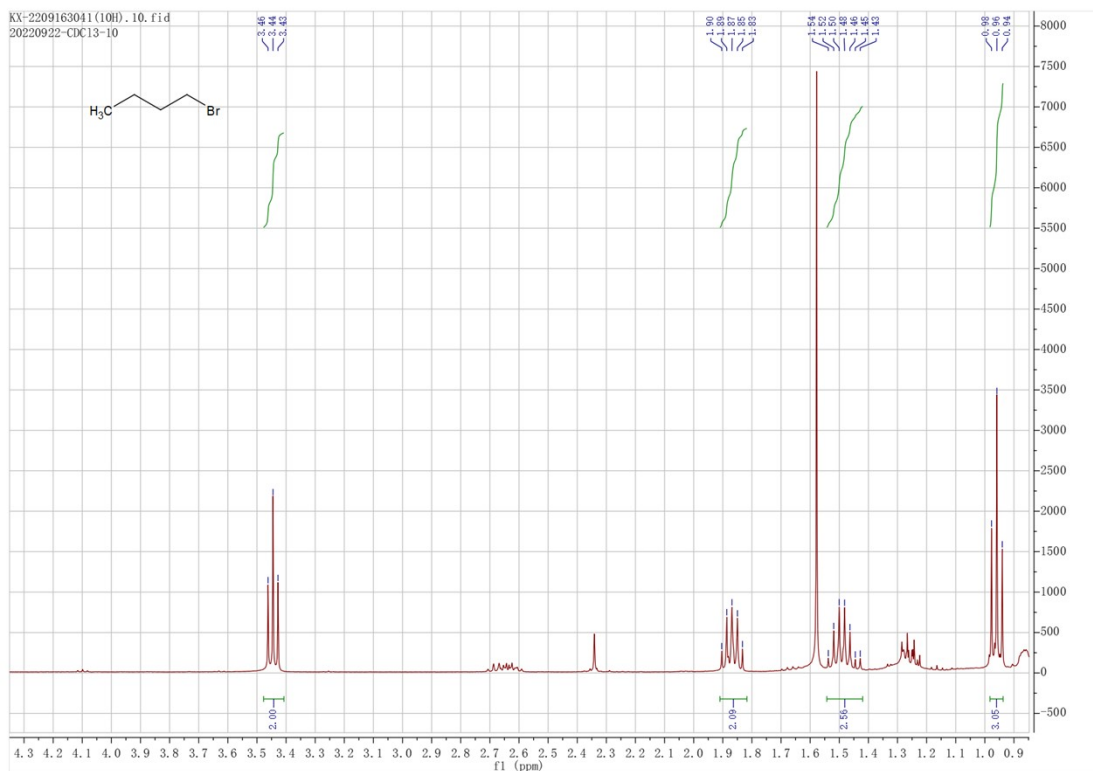

188

189  $^1\text{H}$  NMR (500 MHz,  $\text{CDCl}_3$ ):  $\delta$  (ppm): 3.46-3.43 (t, 2H), 1.90-1.83 (m, 2H), 1.54-1.43

190 (m, 2H), 0.98-0.94 (t, 3H).

191 **Figure S20.** The GC-MS and  $^1\text{H}$  NMR spectrum of the hydrogenation results (table 2

192 of main text, entry 13).

193

194 **Reference.**

195 1. Z. Li, Y. Shi, A. Zhu, Y. Zhao, H. Wang, B. P. Binks and J. Wang, *Angew Chem*

196 *Int Ed Engl*, 2021, 60, 3928-3933.

197 2. L. Fu, S. Li, Z. Han, H. Liu and H. yang, *Chem Commun (Camb)*, 2014, 50, 10045-

198 10048.

199 3. J. Huang and H. Yang, *Chem Commun (Camb)*, 2015, 51, 7333-7336.

200 4. F. Harraz, S. El-Hout, H. Killa and I. Ibrahim, *Journal of catalysis*, 2012, 286, 184-

201 192.
